# Supplementary material for: Gut indigenous Ruminococcus gnavus alleviates constipation and stress-related behaviors in mice with loperamide-induced constipation
Source: Royal Society of Chemistry journal article supplement (doi:10.1039/d2fo03574j), 2023-01-01
Supplement: d2fo03574j1.pdf [file d2fo03574j1.pdf]

**Table S1** Clinical characteristics of patients with constipation

| Gender                        | Male  |       | Female |         |     |
|-------------------------------|-------|-------|--------|---------|-----|
|                               |       |       |        |         |     |
|                               | 9     |       | 11     |         |     |
| Age                           | 18-35 | 36-50 | 51-65  | 66-80   | >80 |
|                               | 0     | 5     | 11     | 3       | 1   |
| Course of the disease (years) | <1    | 1-5   | 5.1-10 | 10.1-20 | >20 |
|                               | 2     | 9     | 6      | 1       | 2   |

**Table S2** Constipation score scale of 20 patients

|            |                       | Frequency of bowel movement | Difficulty: painful evacuation effort | Completeness: feeling incomplete evacuation | Pain: abdominal pain | Time: minutes in lavatory per attempt | Assistance: type of assistance | Failure: unsuccessful attempts for evacuation per 24 h | History: duration of constipation (year) |              |
|------------|-----------------------|-----------------------------|---------------------------------------|---------------------------------------------|----------------------|---------------------------------------|--------------------------------|--------------------------------------------------------|------------------------------------------|--------------|
| <b>No.</b> | <b>Treatment time</b> | 0 1-2 times per 1-2 days    | 0 Never                               | 0 Never                                     | 0 Never              | 0 Less than 5                         | 0 Without assistance           | 0 Never                                                | 0 0                                      | <b>Total</b> |
|            |                       | 1 2 times per week          | 1 Rarely                              | 1 Rarely                                    | 1 Rarely             | 1 5-10                                | 1 Stimulant laxatives          | 1 1-3                                                  | 1 1-5                                    |              |
|            |                       | 2 once per week             | 2 Sometimes                           | 2 Sometimes                                 | 2 Sometimes          | 2 10-20                               |                                | 2 3-6                                                  | 2 5-10                                   |              |
|            |                       | 3 Less than once per week   | 3 Usually                             | 3 Usually                                   | 3 Usually            | 3 20-30                               | 2 Digital assistance or enema  | 3 6-9                                                  | 3 10-20                                  |              |
|            |                       | 4 Less than once per month  | 4 Always                              | 4 Always                                    | 4 Always             | 4 More than 30                        |                                | 4 More than 9                                          | 4 More than 20                           |              |
| 1          | before                | 3                           | 3                                     | 4                                           | 3                    | 3                                     | 2                              | 2                                                      | 3                                        | 23           |
|            | after                 | 1                           | 1                                     | 2                                           | 1                    | 3                                     | 0                              | 1                                                      | 3                                        | 12           |
| 2          | before                | 3                           | 4                                     | 2                                           | 3                    | 4                                     | 2                              | 3                                                      | 2                                        | 23           |
|            | after                 | 2                           | 2                                     | 0                                           | 1                    | 3                                     | 0                              | 0                                                      | 2                                        | 10           |

---

|   |        |   |   |   |   |   |   |   |   |    |
|---|--------|---|---|---|---|---|---|---|---|----|
| 3 | before | 3 | 4 | 3 | 4 | 4 | 2 | 3 | 3 | 26 |
|   | after  | 2 | 2 | 0 | 1 | 3 | 1 | 0 | 3 | 12 |
| 4 | before | 4 | 4 | 3 | 3 | 3 | 2 | 3 | 4 | 26 |
|   | after  | 3 | 2 | 2 | 2 | 2 | 0 | 2 | 4 | 17 |
| 5 | before | 3 | 4 | 4 | 4 | 4 | 1 | 2 | 3 | 25 |
|   | after  | 2 | 2 | 1 | 1 | 3 | 0 | 1 | 3 | 13 |
| 6 | before | 3 | 4 | 4 | 2 | 4 | 1 | 2 | 3 | 23 |
|   | after  | 1 | 1 | 1 | 0 | 0 | 0 | 0 | 3 | 6  |
| 7 | before | 3 | 4 | 3 | 3 | 4 | 2 | 3 | 4 | 26 |
|   | after  | 2 | 2 | 0 | 1 | 2 | 1 | 1 | 4 | 13 |
| 8 | before | 3 | 4 | 4 | 4 | 4 | 1 | 3 | 3 | 26 |
|   | after  | 2 | 2 | 1 | 2 | 2 | 0 | 2 | 3 | 14 |
| 9 | before | 3 | 4 | 4 | 4 | 4 | 1 | 3 | 3 | 26 |
|   | after  | 2 | 2 | 1 | 1 | 2 | 0 | 0 | 3 | 11 |

---

---

|    |        |   |   |   |   |   |   |   |   |    |
|----|--------|---|---|---|---|---|---|---|---|----|
| 10 | before | 3 | 4 | 2 | 3 | 3 | 1 | 2 | 4 | 22 |
|    | after  | 2 | 1 | 2 | 1 | 3 | 1 | 1 | 4 | 15 |
| 11 | before | 3 | 4 | 4 | 3 | 3 | 2 | 2 | 3 | 24 |
|    | after  | 2 | 1 | 1 | 1 | 1 | 1 | 0 | 3 | 10 |
| 12 | before | 3 | 4 | 3 | 2 | 4 | 1 | 3 | 3 | 23 |
|    | after  | 2 |   | 1 | 0 | 2 | 0 | 0 | 3 | 8  |
| 13 | before | 3 | 4 | 3 | 3 | 4 | 1 | 3 | 2 | 23 |
|    | after  | 1 | 1 | 0 | 0 | 1 | 1 | 1 | 2 | 7  |
| 14 | before | 3 | 4 | 4 | 2 | 4 | 2 | 2 | 3 | 24 |
|    | after  | 2 | 1 | 1 | 0 | 1 | 0 | 1 | 3 | 9  |
| 15 | before | 4 | 4 | 4 | 2 | 3 | 2 | 3 | 3 | 25 |
|    | after  | 3 | 2 | 1 | 0 | 2 | 0 | 1 | 3 | 12 |
| 16 | before | 4 | 4 | 4 | 3 | 3 | 2 | 2 | 4 | 26 |
|    | after  | 3 | 2 | 1 | 1 | 2 | 0 | 0 | 4 | 13 |

---

---

|    |        |   |   |   |   |   |   |   |   |    |
|----|--------|---|---|---|---|---|---|---|---|----|
| 17 | before | 2 | 4 | 2 | 3 | 3 | 1 | 2 | 3 | 20 |
|    | after  | 1 | 2 | 0 | 1 | 1 | 0 | 0 | 3 | 8  |
| 18 | before | 3 | 3 | 3 | 2 | 4 | 2 | 3 | 3 | 23 |
|    | after  | 3 | 1 | 1 | 0 | 1 | 0 | 0 | 3 | 9  |
| 19 | before | 3 | 4 | 3 | 4 | 4 | 2 | 3 | 2 | 25 |
|    | after  | 2 | 2 | 1 | 1 | 2 | 0 | 0 | 2 | 10 |
| 20 | before | 3 | 4 | 4 | 2 | 4 | 2 | 3 | 3 | 25 |
|    | after  | 2 | 1 | 1 | 0 | 2 | 0 | 0 | 3 | 9  |

---

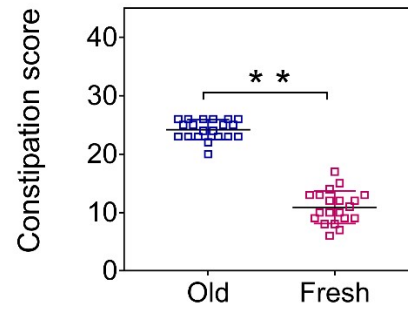

**Figure S1** Constipation score were evaluated according to the questionnaire submitted by the patient.

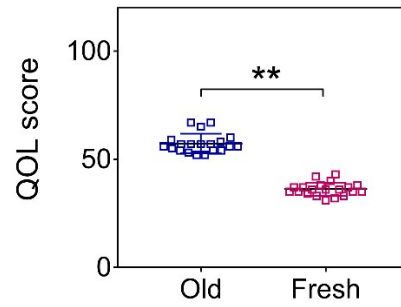

**Figure S2** Quality of life (QOL) score were evaluated according to the questionnaire submitted by the patient.

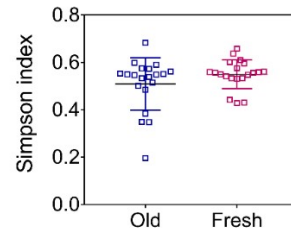

**Figure S3** The Simpson index (n=20). Alterations in gut microbial communities between fresh feces and long-term accumulated feces (old feces) in patients with refractory constipation

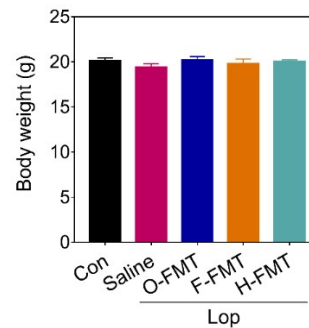

**Figure S4** Body weight of mice by transplanting fecal microbiota from the old and fresh feces of refractory constipation patients and healthy volunteers, respectively. FMT, fecal microbiota transplantation; Lop, Loperamide; Con (control) group; Saline group, the mice were gavaged saline; O-FMT group, constipation mice were transplanted with the fecal microbiota from the old feces of refractory constipation patients; F-FMT group, constipation mice were transplanted with the fecal microbiota from the fresh feces of refractory constipation patients; H-FMT group, constipation mice were transplanted with the fecal microbiota from healthy controls. All data are shown as mean  $\pm$  SD (n=6).

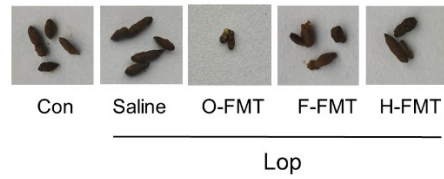

**Figure S5** The representative images about the appearance of mice feces.

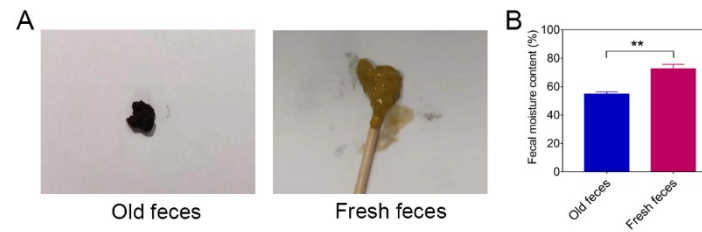

**Figure S6** (A) The representative images about the appearance of old feces and fresh feces. (B) The fecal moisture content between fresh and old feces of patients with refractory constipation.
